# Supplementary material for: Combining transposon mutagenesis and reporter genes to identify novel regulators of the topA promoter in Streptomyces
Source: PubMed Central journal article supplement (PMC8120823; doi:10.1186/s12934-021-01590-7), 2021-05-13

# Fig. S2

## A

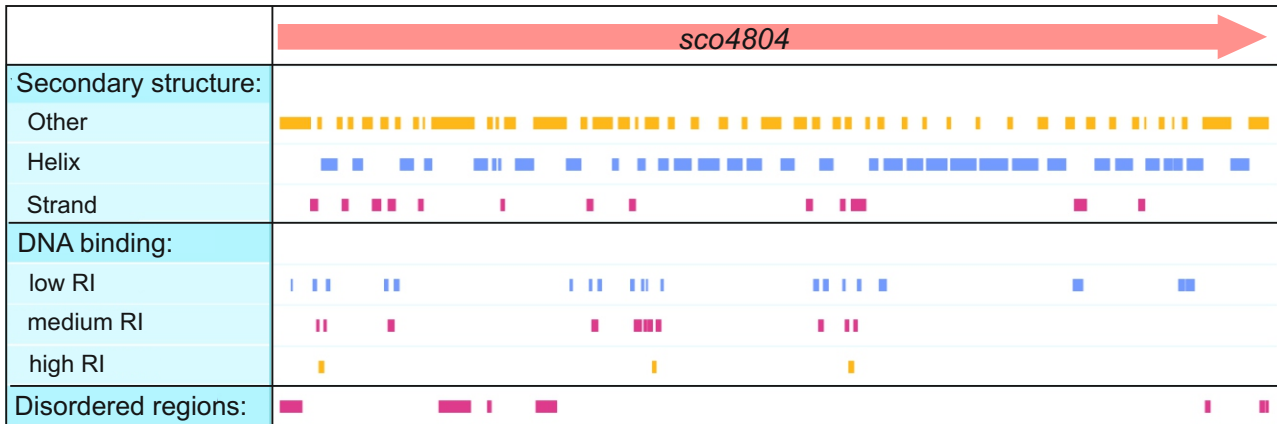

## B

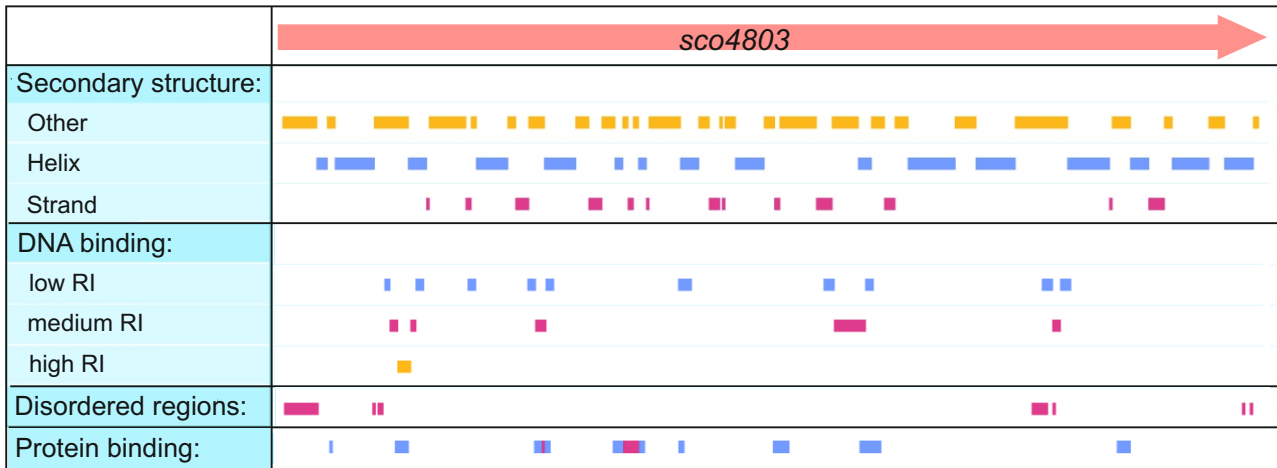

## C

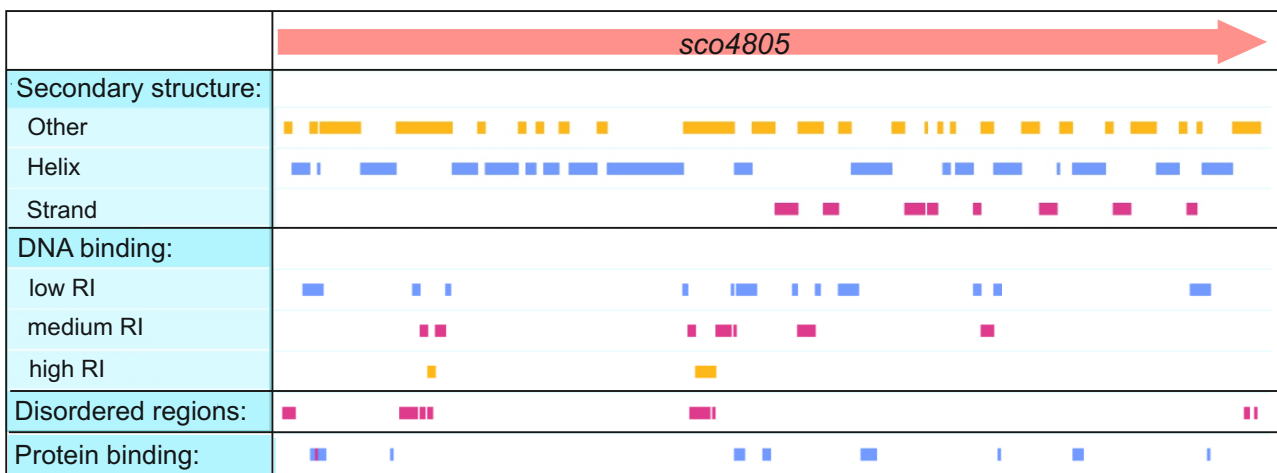

Supplement: 12934_2021_1590_MOESM2_ESM.pdf [file 12934_2021_1590_MOESM2_ESM.pdf]
